# Supplementary material
Source: publisher figshare collection journal article supplement (https://acs.figshare.com/ndownloader/files/4765450)
Supplement: Supplementary file 1 [file 4765450]

**FRET-templated by G-Quadruplex DNA:  
A specific ternary interaction using an original pair of donor/acceptor.**

Clémence Allain, David Monchaud and Marie-Paule Teulade-Fichou<sup>\*</sup>  
*Laboratoire de Chimie des Interactions Moléculaires, Collège de France, CNRS UPR 285,  
11 place Marcelin Berthelot, 75005 Paris, France.*

**Supporting informations :**

**UV-VIS & FLUORESCENCE EXPERIMENTS:**

Fluorescence measurements are performed on a FluoroMax-3 spectrofluorimeter (Jobin-Yvon). A temperature of 20°C is kept constant with thermostated cell holders. Each experiment is performed in a 3mL-cell, in 3mL of 10mM sodium cacodylate buffer (pH 7.3) with 100mM KCl. A fluorescence emission spectrum is recorded at 0 and 5 min after each addition of DNA (only spectra recorded after 5 min are presented) at the excitation wavelengths 501nm. UV-Vis measurements are performed on a Uvikon XL Secomam spectrophotometer.

**Figure S1 – Titration Curves BOQ<sub>1</sub>/TO/22AG (328nm)**

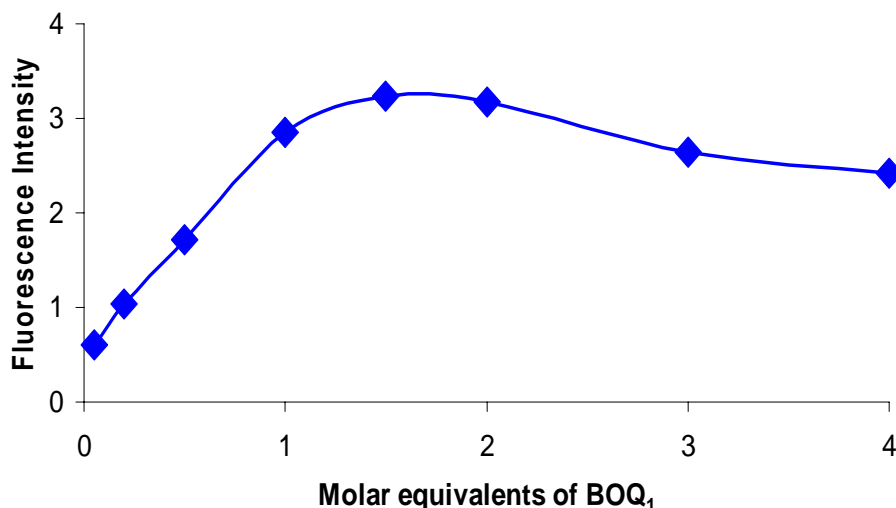

FRET-mediated excitation ( $\lambda_{\text{ex}} = 328\text{nm}$ ,  $\lambda_{\text{em}} = 539\text{nm}$ ) of TO (0.5 $\mu\text{M}$ ) in presence of 22AG (0.25 $\mu\text{M}$ ) and increasing amounts of BOQ<sub>1</sub> in a 10mM sodium cacodylate buffer pH 7.3 100mM KCl.

**Figure S2 – Titration Curves TO/TBA (501nm)**

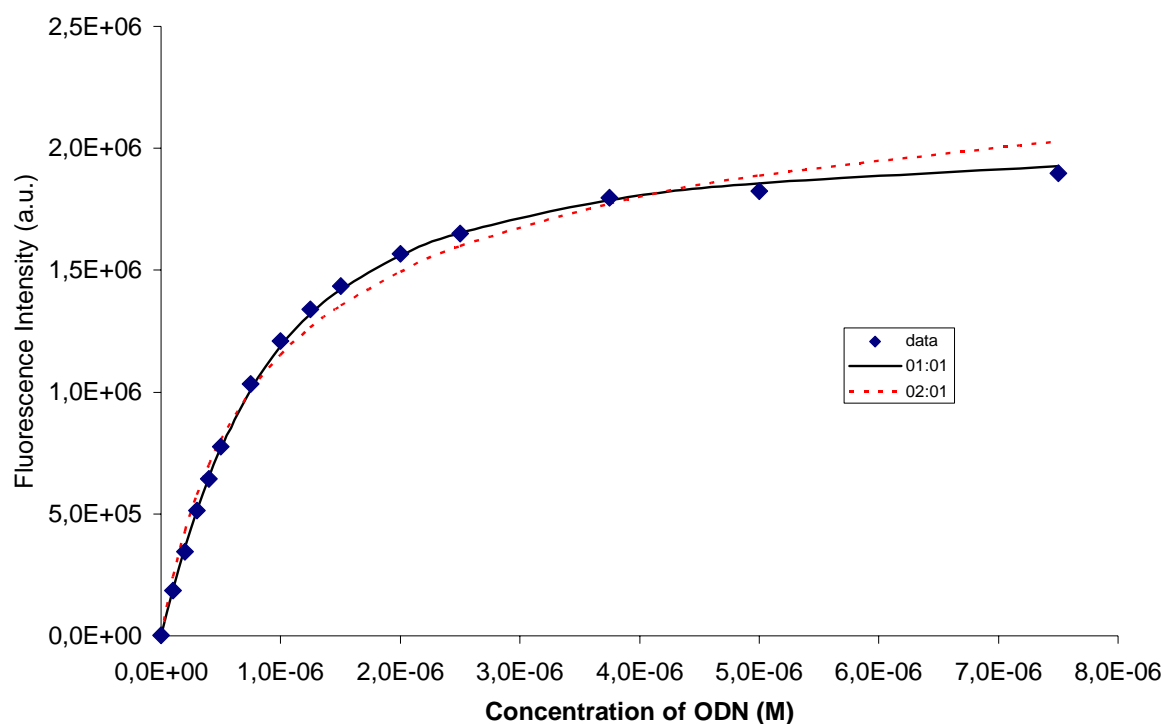

Fluorescence intensity ( $\lambda_{\text{ex}} = 501\text{nm}$ ) of TO ( $1\mu\text{M}$ ) under addition of increasing amounts of TBA in a 10mM sodium cacodylate buffer pH 7.3 100mM KCl. Experimental (black diamonds) and calculated (Specfit32 version 3.0, *Spectrum Software Associates*, Marlborough, MA, U.S.A.) titration curves (plain black line for 1:1 fit and red dashed line for 2:1 fit respectively).

**Figure S3 – Spectral characteristics of MMQ<sub>1</sub> and TO**

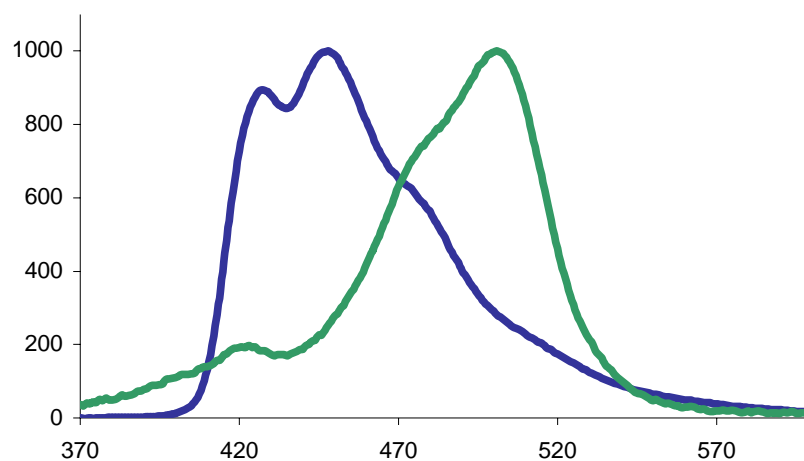

Spectral overlap between fluorescence emission ( $\lambda_{\text{ex}} = 328\text{nm}$ ) of MMQ<sub>1</sub> (0.5 $\mu\text{M}$ , 10mM sodium cacodylate buffer pH 7.3 100mM KCl, blue) and UV-Vis absorption of TO (2.5 $\mu\text{M}$ , 10mM sodium cacodylate buffer pH 7.3 100mM KCl, green).
